# Supplementary material for: Effect of Measurement System Configuration and Operating Conditions on 2D Material-Based Gas Sensor Sensitivity
Source: MDPI journal article supplement (doi:10.3390/nano13030573), 2023-01-31
Supplement: s1 [file s1]

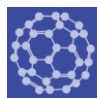

## Supplementary Materials

# Effect of Measurement System Configuration and Operating Conditions on 2D Material-Based Gas Sensor Sensitivity

Jongwon Ryu <sup>1,†</sup>, Seob Shim <sup>1,†</sup>, Jeongin Song <sup>1,2</sup>, Jaeseo Park <sup>1,3</sup>, Ha Sul Kim <sup>2</sup>, Seoung-Ki Lee <sup>4</sup>, Jae Cheol Shin <sup>5</sup>, Jihun Mun <sup>1,\*</sup> and Sang-Woo Kang <sup>1,3,\*</sup>

<sup>1</sup> Advanced Instrumentation Institute, Korea Research Institute of Standards and Science, Daejeon 34113, Republic of Korea

<sup>2</sup> Department of Physics, Chonnam National University, Gwangju 61186, Republic of Korea

<sup>3</sup> Precision Measurement, University of Science and Technology, Daejeon 34113, Republic of Korea

<sup>4</sup> School of Materials Science and Engineering, Pusan National University, Busan 46241, Republic of Korea

<sup>5</sup> Division of Electronics and Electrical Engineering, Dongguk University, Seoul 04620, Republic of Korea

\* Correspondence: jmun@kriss.re.kr (J.M.) ; swkang@kriss.re.kr (S.W.K.)

† These authors contributed equally to this work.

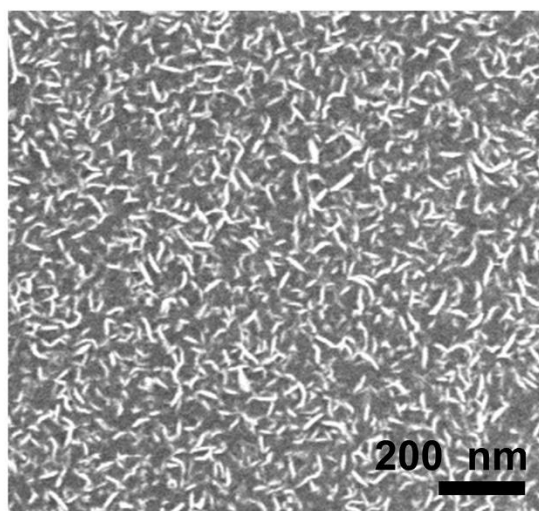

**Figure S1.** SEM image of the MOCVD grown MoS<sub>2</sub> nanoflower.

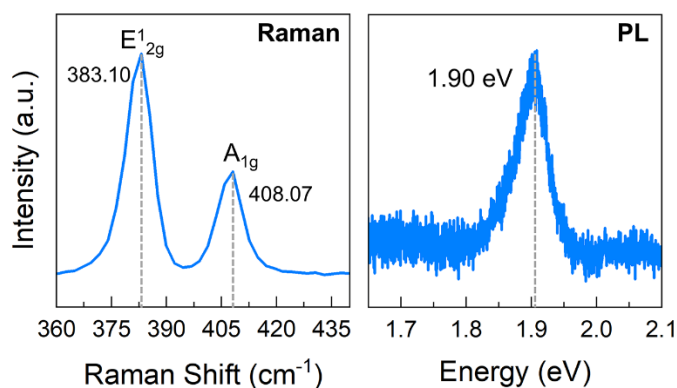

**Figure S2.** Raman (left) and PL (right) spectra of the MoS<sub>2</sub> nanoflower.

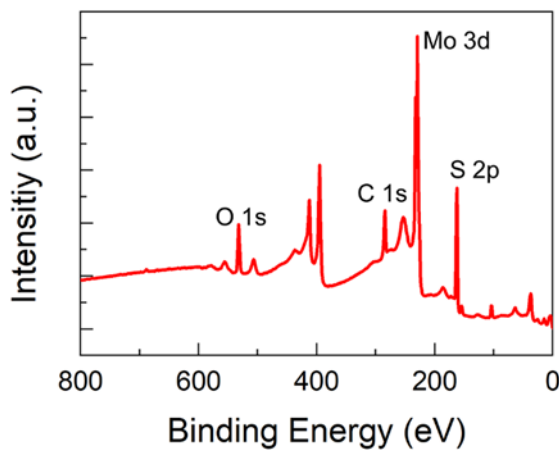

**Figure S3.** XPS survey spectrum of MoS<sub>2</sub> nanoflower.

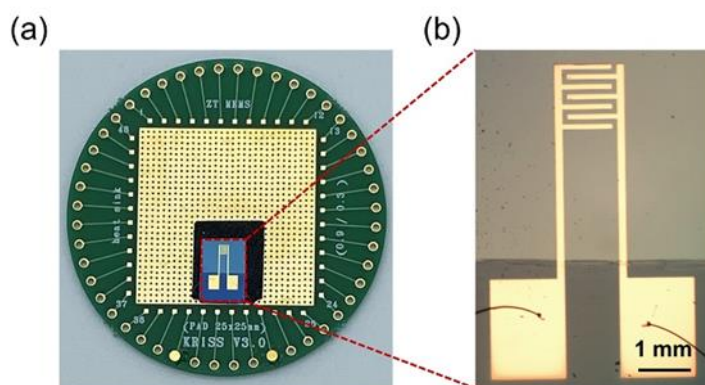

**Figure S4.** (a) Optical image of the gas sensor attached to a printed circuit board and the connected electrodes using gold wire bonding. (b) Optical microscope image of the gas sensor.

**Table S1.** Basic parameters of the gas sensor fabrication.

| Sensor dimension | Channel dimension | Electrode thickness | Electrodes gap |
|------------------|-------------------|---------------------|----------------|
| 6 mm × 9 mm      | 6 mm × 5 mm       | 250 nm              | 100 μm         |

**Table S2.** Normalized gas sensitivity of the MoS<sub>2</sub> gas sensor to 5 ppm of the analyte NO<sub>2</sub> with different angles and distances between the gas inlet and the sensor surface.

---

| Angle (°) | Distance (mm) | Normalized sensitivity (%) |
|-----------|---------------|----------------------------|
| 0         | 2             | 0.6                        |
| 45        | 2             | 0.8                        |
| 90        | 2             | 1                          |
| 90        | 3             | 0.9                        |
| 90        | 4             | 0.8                        |
